# Supplementary material for: Dual optimization of microporosity in carbon spheres for CO2 adsorption by using pyrrole as the carbon precursor and potassium salt as the activator
Source: Royal Society of Chemistry journal article supplement (doi:10.1039/c7ta05523d), 2017-01-01
Supplement: c7ta05523d1.pdf [file c7ta05523d1.pdf]

# Dual Optimization of Microporosity in Carbon Spheres for CO<sub>2</sub> Adsorption by using Pyrrole as Carbon Precursor and Potassium Salt as Activator

Arosha C. Dassanayake<sup>a</sup> and Mietek Jaroniec<sup>\*a</sup>

<sup>a</sup>Department of Chemistry and Biochemistry, Kent State University, Kent, Ohio 44242, USA.  
Fax: (+1)-330-672-3816; Tel: (+1)-330-672- 3790; \*E-mail: [jaroniec@kent.edu](mailto:jaroniec@kent.edu)

## EXPERIMENTAL

### Materials

Resorcinol (98%), Pyrrole (99%) and Ethylenediamine (99%) were obtained from Acros Organics, NJ, USA. 3-aminophenol was purchased from Alfa Aesar, Ward Hill, MA, USA. Formaldehyde (37wt%) and Potassium citrate monohydrate were purchased from Fisher scientific, USA. Ammonium Persulfate was obtained from Sigma Aldrich. Deionized water (DW) was obtained from in-house Ion pure Plus 150 Service Deionization ion-exchange purification system and Aqua One (Amarillo, TX). All reagents were of analytical grade and were used without further purification.

### Characterization

Nitrogen adsorption by each sample was measured at -196 °C using ASAP 2010 volumetric analyzer (Micromeritics, Inc., Norcross, GA) and respective isotherms were obtained. All samples were out gassed under vacuum at 200 °C for 2 h prior to adsorption measurements.

Thermogravimetric (TG) profiles were recorded using High resolution thermogravimetric measurements were recorded on TGA Q-500 analyzer (TA Instruments, Inc., New Castle, DE), from 25 to 900 °C in flowing oxygen with a heating rate of 10 °C / min using a high resolution mode. The initial weight of each sample analyzed ranged 5-15 mg. TG profiles were used to obtain information about the stability of carbon samples studied.

Scanning electron microscopy (SEM) images were obtained using Hitachi S-2600N scanning electron microscope. Prior to SEM analysis samples were dispersed in ethanol followed by sonication at concentrations of ~5-10 wt. %. Sonicated samples were deposited on SEM Hitachi specimen holder and were dried under vacuum at 100 °C for 1h.

Transmission electron microscopy (TEM) images were obtained on a FEI Tecnai G2 F20 microscope. Prior to TEM analysis, the samples were dispersed in ethanol by moderate sonication at concentrations of ~5-10 wt. %, followed by deposition of samples on a Lacy carbon coated, 200-mesh, copper TEM grid by dipping into the sample suspension and was then dried under vacuum at 100 °C for 1 h.

Particle size data was obtained using Horiba scientific SZ-100 nanoparticle analyzer. Prior to measurements samples were dispersed in 95% (v/v) ethanol/water solution and was sonicated for 10 minutes to obtain homogeneously dispersed solution. Each measurement was performed in triplicate.

### **Low temperature (0 °C) and ambient temperature (25 °C) CO<sub>2</sub> adsorption measurements**

CO<sub>2</sub> adsorption measurements were carried out at 0 °C and 25 °C on samples up-to 1.2 atm on ASAP 2020 volumetric adsorption analyzer (Micromeritics, Inc., GA) at 25 °C using ultrahigh purity (99.99 %) gaseous CO<sub>2</sub>. Prior to adsorption analysis each sample was outgassed at 200 °C for 2 h under vacuum.

### **Calculations**

Brunauer-Emmett-Teller (BET) method<sup>1</sup> was used to evaluate specific surface area of samples within the relative pressure range of 0.05-0.20. Adsorption branch of nitrogen adsorption-desorption isotherms were used to evaluate pore size distributions (PSD) using the 2DNLDFT heterogeneous surface model for carbon materials implemented in SAIEUS program provided by Micromeritics.<sup>2</sup> PSD curves were calculated by Density Functional Theory (DFT) method.

### **Quantitative analysis of CO<sub>2</sub>/N<sub>2</sub> selectivity (S)**

CO<sub>2</sub>/N<sub>2</sub> selectivity was evaluated according to the ideal adsorbed solution theory (IAST) model<sup>3</sup> using the following formulae:

$S = \frac{n(\text{CO}_2) p(\text{N}_2)}{[n(\text{N}_2) p(\text{CO}_2)]}$ , where S denotes the CO<sub>2</sub>/N<sub>2</sub> is selectivity, n(CO<sub>2</sub>) and n(N<sub>2</sub>) denote the CO<sub>2</sub> and N<sub>2</sub> uptake in mmol/g at CO<sub>2</sub> pressure of 0.15 bar and N<sub>2</sub> pressure of 0.85 bar, respectively.

### **References**

1. Brunauer, S.; Emmett, P. H.; Teller, E. Adsorption of gases in multimolecular layers. *J. Am. Chem. Soc.* **1938**, *60*, 309-319.
2. Jagiello, J.; Olivier, J. P. Carbon slit pore model incorporating surface energetical heterogeneity and geometrical corrugation. *Adsorption* **2013**, *19*, 777-783.
3. Myers, A.; Prausnitz, J. M. Thermodynamics of mixed-gas adsorption. *AIChE J.* **1965**, *11*, 121-127.

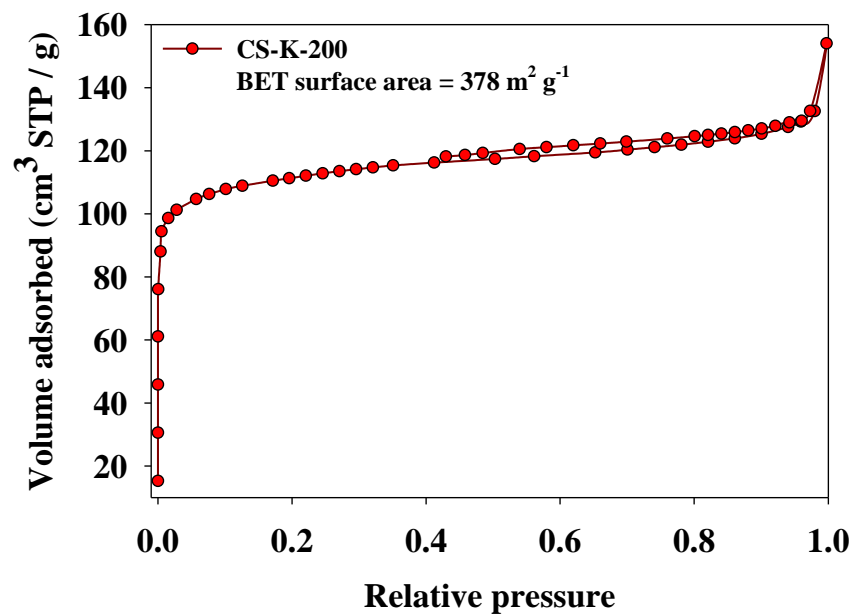

Figure S1.  $N_2$  adsorption isotherm recorded for CS-K-200 sample.

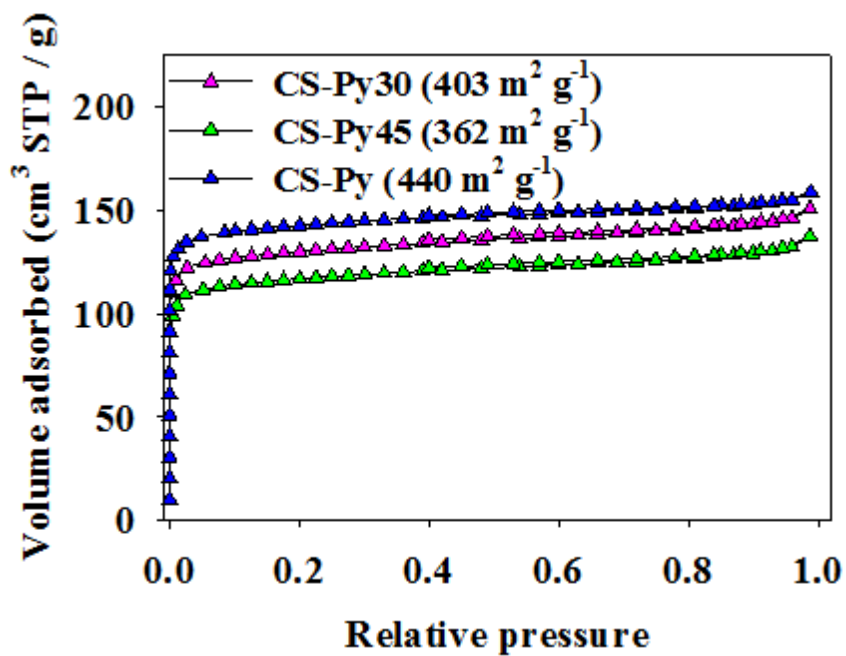

Figure S2.  $N_2$  adsorption isotherms recorded for CS-Py samples.

Table S1. CO<sub>2</sub> uptakes recorded for CS-Kx series of carbons.

| Sample  | Pressure (bar) | CO <sub>2</sub> uptake at 0 °C (mmol g <sup>-1</sup> ) | Pressure (bar) | CO <sub>2</sub> uptake at 25 °C (mmol g <sup>-1</sup> ) |
|---------|----------------|--------------------------------------------------------|----------------|---------------------------------------------------------|
| CS-K50  | 0.0089         | 0.5481                                                 | 0.0065         | 0.1640                                                  |
|         | 0.0139         | 0.7036                                                 | 0.0174         | 0.3354                                                  |
|         | 0.0175         | 0.7989                                                 | 0.0354         | 0.5453                                                  |
|         | 0.0270         | 0.9811                                                 | 0.0475         | 0.6583                                                  |
|         | 0.0327         | 1.0757                                                 | 0.0643         | 0.7949                                                  |
|         | 0.0349         | 1.1095                                                 | 0.0966         | 1.0106                                                  |
|         | 0.0969         | 1.6937                                                 | 0.1781         | 1.4034                                                  |
|         | 0.2070         | 2.1968                                                 | 0.2562         | 1.6779                                                  |
|         | 0.3577         | 2.5682                                                 | 0.3846         | 2.0150                                                  |
|         | 0.4824         | 2.7726                                                 | 0.5141         | 2.2709                                                  |
|         | 0.6261         | 2.9458                                                 | 0.6424         | 2.4798                                                  |
|         | 0.6960         | 3.0232                                                 | 0.7721         | 2.6567                                                  |
|         | 0.8376         | 3.1438                                                 | 0.9008         | 2.8092                                                  |
|         | 0.9054         | 3.2059                                                 | 1.0295         | 2.9434                                                  |
| 1.0472  | 3.3008         |                                                        |                |                                                         |
| CS-K75  | 0.0092         | 0.3584                                                 | 0.0069         | 0.1054                                                  |
|         | 0.0137         | 0.4826                                                 | 0.0175         | 0.2330                                                  |
|         | 0.0168         | 0.5564                                                 | 0.0320         | 0.3761                                                  |
|         | 0.0262         | 0.7515                                                 | 0.0483         | 0.5119                                                  |
|         | 0.0304         | 0.8284                                                 | 0.0645         | 0.6310                                                  |
|         | 0.0350         | 0.9072                                                 | 0.0969         | 0.8342                                                  |
|         | 0.0948         | 1.6258                                                 | 0.1771         | 1.2232                                                  |
|         | 0.2104         | 2.4118                                                 | 0.2570         | 1.5187                                                  |
|         | 0.3621         | 3.0338                                                 | 0.3849         | 1.8852                                                  |
|         | 0.5041         | 3.4362                                                 | 0.5139         | 2.1766                                                  |
|         | 0.6241         | 3.6997                                                 | 0.6426         | 2.4166                                                  |
|         | 0.6956         | 3.8368                                                 | 0.7718         | 2.6217                                                  |
|         | 0.8371         | 4.0644                                                 | 0.9006         | 2.8003                                                  |
|         | 0.9054         | 4.1647                                                 | 1.0295         | 2.9578                                                  |
| 1.0466  | 4.3383         |                                                        |                |                                                         |
| CS-K100 | 0.0084         | 0.6908                                                 | 0.0061         | 0.4286                                                  |
|         | 0.0135         | 0.9113                                                 | 0.0174         | 0.6760                                                  |
|         | 0.0172         | 1.0429                                                 | 0.0355         | 0.9532                                                  |
|         | 0.0264         | 1.3228                                                 | 0.0482         | 1.1110                                                  |
|         | 0.0301         | 1.4234                                                 | 0.0646         | 1.3014                                                  |
|         | 0.0350         | 1.5441                                                 | 0.0971         | 1.5768                                                  |
|         | 0.0953         | 2.5822                                                 | 0.1798         | 2.1136                                                  |
|         | 0.2088         | 3.7354                                                 | 0.2575         | 2.5034                                                  |
|         | 0.3623         | 4.7242                                                 | 0.3862         | 3.0175                                                  |
|         | 0.5048         | 5.3782                                                 | 0.5147         | 3.4443                                                  |
|         | 0.6245         | 5.8123                                                 | 0.6436         | 3.8137                                                  |
|         | 0.6956         | 6.0404                                                 | 0.7724         | 4.1500                                                  |
|         | 0.8373         | 6.4187                                                 | 0.9010         | 4.4511                                                  |
|         | 0.9052         | 6.5888                                                 | 1.0295         | 4.7354                                                  |
| 1.0469  | 6.8892         |                                                        |                |                                                         |

Table S2. CO<sub>2</sub> uptakes recorded for CS-E-Kx series of carbons.

| Sample    | Pressure (bar) | CO <sub>2</sub> uptake at 0 °C (mmol g <sup>-1</sup> ) | Pressure (bar) | CO <sub>2</sub> uptake at 25 °C (mmol g <sup>-1</sup> ) |
|-----------|----------------|--------------------------------------------------------|----------------|---------------------------------------------------------|
| CS-E-K50  | 0.0085         | 0.4650                                                 | 0.0065         | 0.2367                                                  |
|           | 0.0135         | 0.6193                                                 | 0.0172         | 0.4306                                                  |
|           | 0.0183         | 0.7423                                                 | 0.0345         | 0.6509                                                  |
|           | 0.0263         | 0.9110                                                 | 0.0473         | 0.7767                                                  |
|           | 0.0303         | 0.9845                                                 | 0.0643         | 0.9187                                                  |
|           | 0.0350         | 1.0639                                                 | 0.0971         | 1.1297                                                  |
|           | 0.0961         | 1.7378                                                 | 0.1790         | 1.5006                                                  |
|           | 0.2071         | 2.3735                                                 | 0.2565         | 1.7448                                                  |
|           | 0.3643         | 2.8852                                                 | 0.3846         | 2.0345                                                  |
|           | 0.5055         | 3.1908                                                 | 0.5140         | 2.2463                                                  |
|           | 0.6247         | 3.3902                                                 | 0.6425         | 2.4166                                                  |
|           | 0.6962         | 3.4952                                                 | 0.7722         | 2.5584                                                  |
|           | 0.8371         | 3.6640                                                 | 0.9008         | 2.6796                                                  |
|           | 0.9055         | 3.7418                                                 | 1.0296         | 2.7855                                                  |
| 1.0467    | 3.8738         |                                                        |                |                                                         |
| CS-E-K75  | 0.0089         | 0.5781                                                 | 0.0065         | 0.1841                                                  |
|           | 0.0131         | 0.7197                                                 | 0.0162         | 0.3581                                                  |
|           | 0.0178         | 0.8536                                                 | 0.0347         | 0.5907                                                  |
|           | 0.0267         | 1.0429                                                 | 0.0468         | 0.7110                                                  |
|           | 0.0295         | 1.0998                                                 | 0.0640         | 0.8554                                                  |
|           | 0.0354         | 1.2035                                                 | 0.0969         | 1.0737                                                  |
|           | 0.0962         | 1.8599                                                 | 0.1785         | 1.4539                                                  |
|           | 0.2057         | 2.4341                                                 | 0.2559         | 1.7068                                                  |
|           | 0.3530         | 2.8481                                                 | 0.3841         | 2.0098                                                  |
|           | 0.5060         | 3.1173                                                 | 0.5136         | 2.2354                                                  |
|           | 0.6239         | 3.2711                                                 | 0.6423         | 2.4130                                                  |
|           | 0.6961         | 3.3528                                                 | 0.7718         | 2.5599                                                  |
|           | 0.8372         | 3.4799                                                 | 0.9007         | 2.6832                                                  |
|           | 0.9056         | 3.5390                                                 | 1.0294         | 2.7903                                                  |
| 1.0468    | 3.6368         |                                                        |                |                                                         |
| CS-E-K100 | 0.0086         | 0.8866                                                 | 0.0076         | 0.0562                                                  |
|           | 0.0135         | 1.0663                                                 | 0.0182         | 0.1451                                                  |
|           | 0.0186         | 1.2322                                                 | 0.0329         | 0.2568                                                  |
|           | 0.0265         | 1.4426                                                 | 0.0486         | 0.3612                                                  |
|           | 0.0307         | 1.5391                                                 | 0.0648         | 0.4603                                                  |
|           | 0.0351         | 1.6301                                                 | 0.0966         | 0.6583                                                  |
|           | 0.0977         | 2.4959                                                 | 0.1793         | 1.1144                                                  |
|           | 0.2087         | 3.3471                                                 | 0.2579         | 1.4758                                                  |
|           | 0.3443         | 4.0200                                                 | 0.3864         | 1.9803                                                  |
|           | 0.4865         | 4.5374                                                 | 0.5148         | 2.4181                                                  |
|           | 0.6271         | 4.9475                                                 | 0.6436         | 2.8117                                                  |
|           | 0.6966         | 5.1424                                                 | 0.7723         | 3.1749                                                  |
|           | 0.8375         | 5.4634                                                 | 0.9010         | 3.5129                                                  |
|           | 0.9058         | 5.6208                                                 | 1.0296         | 3.8337                                                  |
| 1.0466    | 5.8959         |                                                        |                |                                                         |

Table S3. CO<sub>2</sub> uptakes recorded for CS-Py-Kx series of carbons.

| Sample     | Pressure (bar) | CO <sub>2</sub> uptake at 0 °C (mmol g <sup>-1</sup> ) | Pressure (bar) | CO <sub>2</sub> uptake at 25 °C (mmol g <sup>-1</sup> ) |
|------------|----------------|--------------------------------------------------------|----------------|---------------------------------------------------------|
| CS-Py      | 0.0089         | 0.7658                                                 | 0.0067         | 0.3018                                                  |
|            | 0.0132         | 0.9275                                                 | 0.0163         | 0.5120                                                  |
|            | 0.0169         | 1.0410                                                 | 0.0353         | 0.7829                                                  |
|            | 0.0265         | 1.2634                                                 | 0.0463         | 0.8977                                                  |
|            | 0.0297         | 1.3267                                                 | 0.0637         | 1.0532                                                  |
|            | 0.0350         | 1.4200                                                 | 0.0971         | 1.2870                                                  |
|            | 0.0953         | 2.0669                                                 | 0.1791         | 1.6789                                                  |
|            | 0.2056         | 2.6449                                                 | 0.2558         | 1.9370                                                  |
|            | 0.3552         | 3.0737                                                 | 0.3845         | 2.2502                                                  |
|            | 0.4815         | 3.3130                                                 | 0.5137         | 2.4844                                                  |
|            | 0.6257         | 3.5129                                                 | 0.6426         | 2.6691                                                  |
|            | 0.6956         | 3.5993                                                 | 0.7719         | 2.8239                                                  |
|            | 0.8375         | 3.7372                                                 | 0.9008         | 2.9558                                                  |
|            | 0.9056         | 3.8030                                                 | 1.0295         | 3.0708                                                  |
| 1.0469     | 3.9089         |                                                        |                |                                                         |
| CS-Py-K50  | 0.0094         | 0.4493                                                 | 0.0067         | 0.1558                                                  |
|            | 0.0133         | 0.5623                                                 | 0.0164         | 0.3163                                                  |
|            | 0.0169         | 0.6539                                                 | 0.0319         | 0.5187                                                  |
|            | 0.0261         | 0.8493                                                 | 0.0485         | 0.6933                                                  |
|            | 0.0306         | 0.9310                                                 | 0.0644         | 0.8462                                                  |
|            | 0.0351         | 1.0098                                                 | 0.0972         | 1.0949                                                  |
|            | 0.0974         | 1.7419                                                 | 0.1790         | 1.5666                                                  |
|            | 0.2085         | 2.4987                                                 | 0.2571         | 1.9109                                                  |
|            | 0.3429         | 3.0986                                                 | 0.3857         | 2.3551                                                  |
|            | 0.4856         | 3.5670                                                 | 0.5144         | 2.7205                                                  |
|            | 0.6267         | 3.9346                                                 | 0.6434         | 3.0276                                                  |
|            | 0.6960         | 4.1009                                                 | 0.7721         | 3.2958                                                  |
|            | 0.8374         | 4.3825                                                 | 0.9008         | 3.5350                                                  |
|            | 0.9057         | 4.5157                                                 | 1.0295         | 3.7514                                                  |
| 1.0467     | 4.7447         |                                                        |                |                                                         |
| CS-Py-K100 | 0.0094         | 0.2800                                                 | 0.0064         | 0.2562                                                  |
|            | 0.0142         | 0.3849                                                 | 0.0173         | 0.5050                                                  |
|            | 0.0175         | 0.4503                                                 | 0.0351         | 0.7985                                                  |
|            | 0.0266         | 0.6109                                                 | 0.0472         | 0.9602                                                  |
|            | 0.0308         | 0.6801                                                 | 0.0643         | 1.1592                                                  |
|            | 0.0352         | 0.7478                                                 | 0.0965         | 1.4762                                                  |
|            | 0.0982         | 1.5278                                                 | 0.1772         | 2.0866                                                  |
|            | 0.2097         | 2.5430                                                 | 0.2567         | 2.5485                                                  |
|            | 0.3467         | 3.5411                                                 | 0.3849         | 3.1340                                                  |
|            | 0.4870         | 4.4263                                                 | 0.5140         | 3.6082                                                  |
|            | 0.6273         | 5.2262                                                 | 0.6428         | 4.0049                                                  |
|            | 0.6967         | 5.6161                                                 | 0.7718         | 4.3455                                                  |
|            | 0.8376         | 6.3355                                                 | 0.9006         | 4.6481                                                  |
|            | 0.9058         | 6.6870                                                 | 1.0295         | 4.9197                                                  |
| 1.0469     | 7.3509         |                                                        |                |                                                         |

Table S4. N<sub>2</sub> uptakes recorded up to 1 bar for CS-K100, CS-E-K100 and CS-Py-K100 samples.

| Sample    | Pressure (bar) | N <sub>2</sub> uptake at 0 °C<br>(mmol g <sup>-1</sup> ) | Pressure (bar) | N <sub>2</sub> uptake at 25 °C<br>(mmol g <sup>-1</sup> ) |
|-----------|----------------|----------------------------------------------------------|----------------|-----------------------------------------------------------|
| CS-K100   | 0.0125         | 0.0193                                                   | 0.0124         | 0.0096                                                    |
|           | 0.0300         | 0.0442                                                   | 0.0301         | 0.0228                                                    |
|           | 0.0388         | 0.0566                                                   | 0.0395         | 0.0295                                                    |
|           | 0.0524         | 0.0758                                                   | 0.0525         | 0.0387                                                    |
|           | 0.0643         | 0.0919                                                   | 0.0650         | 0.0472                                                    |
|           | 0.0711         | 0.1010                                                   | 0.0711         | 0.0514                                                    |
|           | 0.0773         | 0.1092                                                   | 0.0776         | 0.0561                                                    |
|           | 0.0900         | 0.1266                                                   | 0.0904         | 0.0654                                                    |
|           | 0.1030         | 0.1435                                                   | 0.1029         | 0.0736                                                    |
|           | 0.1532         | 0.2079                                                   | 0.1538         | 0.1093                                                    |
|           | 0.2049         | 0.2713                                                   | 0.2050         | 0.1437                                                    |
|           | 0.2558         | 0.3298                                                   | 0.2561         | 0.1775                                                    |
|           | 0.3070         | 0.3870                                                   | 0.3070         | 0.2099                                                    |
|           | 0.4083         | 0.4929                                                   | 0.4087         | 0.2721                                                    |
|           | 0.5104         | 0.5916                                                   | 0.5110         | 0.3317                                                    |
|           | 0.6122         | 0.6843                                                   | 0.6125         | 0.3885                                                    |
|           | 0.7143         | 0.7717                                                   | 0.7145         | 0.4434                                                    |
|           | 0.8165         | 0.8540                                                   | 0.8165         | 0.4966                                                    |
|           | 0.9184         | 0.9315                                                   | 0.9184         | 0.5472                                                    |
|           | 0.9694         | 0.9714                                                   | 0.9694         | 0.5734                                                    |
| 1.0153    | 1.0068         | 1.0154                                                   | 0.5974         |                                                           |
| CS-E-K100 | 0.0131         | 0.0244                                                   | 0.0127         | 0.0168                                                    |
|           | 0.0302         | 0.0454                                                   | 0.0303         | 0.0315                                                    |
|           | 0.0449         | 0.0735                                                   | 0.0450         | 0.0501                                                    |
|           | 0.0525         | 0.0912                                                   | 0.0516         | 0.0573                                                    |
|           | 0.0650         | 0.1126                                                   | 0.0652         | 0.0705                                                    |
|           | 0.0709         | 0.1199                                                   | 0.0712         | 0.0741                                                    |
|           | 0.0774         | 0.1268                                                   | 0.0777         | 0.0839                                                    |
|           | 0.0903         | 0.1471                                                   | 0.0901         | 0.0985                                                    |
|           | 0.1029         | 0.1657                                                   | 0.1033         | 0.1112                                                    |
|           | 0.1534         | 0.2375                                                   | 0.1543         | 0.1606                                                    |
|           | 0.2047         | 0.3054                                                   | 0.2046         | 0.2042                                                    |
|           | 0.2559         | 0.3658                                                   | 0.2555         | 0.2466                                                    |
|           | 0.3066         | 0.4216                                                   | 0.3070         | 0.2931                                                    |
|           | 0.4087         | 0.5295                                                   | 0.4088         | 0.3668                                                    |
|           | 0.5104         | 0.6284                                                   | 0.5109         | 0.4429                                                    |
|           | 0.6125         | 0.7047                                                   | 0.6126         | 0.5091                                                    |
|           | 0.7144         | 0.7818                                                   | 0.7142         | 0.5782                                                    |
|           | 0.8164         | 0.8679                                                   | 0.8163         | 0.6434                                                    |

|            |        |        |        |        |
|------------|--------|--------|--------|--------|
|            | 0.9184 | 0.9496 | 0.9184 | 0.7018 |
|            | 0.9694 | 1.0034 | 0.9694 | 0.7399 |
|            | 1.0156 | 1.0382 | 1.0153 | 0.7827 |
| CS-Py-K100 | 0.0128 | 0.0170 | 0.0128 | 0.0046 |
|            | 0.0304 | 0.0338 | 0.0305 | 0.0045 |
|            | 0.0387 | 0.0501 | 0.0397 | 0.0102 |
|            | 0.0520 | 0.0701 | 0.0520 | 0.0194 |
|            | 0.0644 | 0.0818 | 0.0648 | 0.0276 |
|            | 0.0711 | 0.0900 | 0.0713 | 0.0319 |
|            | 0.0775 | 0.0955 | 0.0776 | 0.0344 |
|            | 0.0904 | 0.1085 | 0.0901 | 0.0416 |
|            | 0.1033 | 0.1192 | 0.1029 | 0.0496 |
|            | 0.1538 | 0.1648 | 0.1541 | 0.0744 |
|            | 0.2044 | 0.2095 | 0.2047 | 0.0975 |
|            | 0.2555 | 0.2517 | 0.2559 | 0.1196 |
|            | 0.3068 | 0.2924 | 0.3069 | 0.1409 |
|            | 0.4088 | 0.3687 | 0.4088 | 0.1790 |
|            | 0.5107 | 0.4394 | 0.5109 | 0.2146 |
|            | 0.6125 | 0.5059 | 0.6126 | 0.2467 |
|            | 0.7143 | 0.5677 | 0.7149 | 0.2777 |
|            | 0.8163 | 0.6332 | 0.8165 | 0.3071 |
|            | 0.9186 | 0.6882 | 0.9186 | 0.3360 |
|            | 0.9693 | 0.7150 | 0.9695 | 0.3550 |
| 1.0153     | 0.7497 | 1.0154 | 0.3710 |        |



Table S5. CO<sub>2</sub> uptake for CS-Py-K100 sample over five cycles

| Pressure<br>(bar) | CO <sub>2</sub> uptake at 0 °C (mmol g <sup>-1</sup> ) |         |         |         |         |
|-------------------|--------------------------------------------------------|---------|---------|---------|---------|
|                   | Cycle 1                                                | Cycle 2 | Cycle 3 | Cycle 4 | Cycle 5 |
| 0.0094            | 0.2800                                                 | 0.2795  | 0.2700  | 0.2697  | 0.2690  |
| 0.0142            | 0.3849                                                 | 0.3840  | 0.3835  | 0.3830  | 0.3826  |
| 0.0175            | 0.4503                                                 | 0.4499  | 0.4490  | 0.4488  | 0.4480  |
| 0.0266            | 0.6109                                                 | 0.6107  | 0.6100  | 0.6095  | 0.6092  |
| 0.0308            | 0.6801                                                 | 0.6798  | 0.6795  | 0.6780  | 0.6777  |
| 0.0352            | 0.7478                                                 | 0.7470  | 0.7465  | 0.7460  | 0.7453  |
| 0.0982            | 1.5278                                                 | 1.5274  | 1.5260  | 1.5258  | 1.5255  |
| 0.2097            | 2.5430                                                 | 2.5425  | 2.5418  | 2.5413  | 2.5410  |
| 0.3467            | 3.5411                                                 | 3.5400  | 3.5401  | 3.5400  | 3.5395  |
| 0.487             | 4.4263                                                 | 4.4258  | 4.4256  | 4.4255  | 4.4250  |
| 0.6273            | 5.2262                                                 | 5.2258  | 5.2250  | 5.2243  | 5.2240  |
| 0.6967            | 5.6161                                                 | 5.6159  | 5.6150  | 5.6140  | 5.6132  |
| 0.8376            | 6.3355                                                 | 6.3352  | 6.3348  | 6.3340  | 6.3335  |
| 0.9058            | 6.6870                                                 | 6.6865  | 6.6850  | 6.6845  | 6.6840  |
| 1.0469            | 7.3509                                                 | 7.3500  | 7.3497  | 7.3490  | 7.3486  |
